# Supplementary material for: A siloxane-incorporated copolymer as an in situ cross-linkable binder for high performance silicon anodes in Li-ion batteries
Source: Royal Society of Chemistry journal article supplement (doi:10.1039/c6nr01559j), 2016-01-01
Supplement: c6nr01559j1.pdf [file c6nr01559j1.pdf]

## Supplementary Information for:

### **Siloxane incorporated copolymer as an in situ cross-linkable binder for high performance silicon anode in Li-ion battery†**

M. T. Jeena<sup>a,‡</sup>, Taesoo Bok<sup>b,‡</sup>, Si-Hoon Kim<sup>c</sup>, Sooham Park<sup>a</sup>, Ju-Young Kim<sup>c</sup>,  
Soojin Park<sup>\*b</sup>, Ja-Hyoung Ryu<sup>\*a</sup>

<sup>a</sup>Department of Chemistry, School of natural Science, E-mail: E-mail: [jhryu@unist.ac.kr](mailto:jhryu@unist.ac.kr);  
Tel: +82-52-217-2548.

<sup>b</sup>Department of Energy Engineering, School of Energy and Chemical Engineering,  
[spark@unist.ac.kr](mailto:spark@unist.ac.kr); Fax: +82-52-217-2909; Tel: +82-52-217-2515.

<sup>c</sup>School of Materials Science and Engineering

Ulsan National Institute of Science and Technology (UNIST), 50 UNIST-gil, Ulsan 689-798,  
Republic of Korea

#### **Supporting Information figures and text:**

- **Table S1** Characterization of random copolymer (TBA-TEVS-n).
- **Fig. S1.** The first three cycle of cyclic voltammetry using a Si half-cell with TBA-TEVS-21 binder at a potential scan rate of 0.2mV/s.
- **Fig. S2** Nyquist plots of Si anode prepared with polymeric binders with various TEVS contents.
- **Fig. S3** TGA analysis of poly (tert-butyl acrylate) showing decomposition of TBA group at 220 °C.
- **Fig.S4** TGA analysis of TBA-TEVS-21 showing decomposition of TBA group at 215 °C.
- **Fig. S5** The FT-IR showing the formation of anhydride via cross linking of adjacent carboxylic acid functional group as a result of condensation reaction after heating at 150 °C.
- **Fig. S6** Hardness and Modulus measure for TBA-TEVS polymer series before (a), (c) and after (b), (d) cross linking.
- **Fig. S7** Nano indentation for PAA.

Table S1. Characterization of random copolymer (TBA – TEVS-n).

| Polymer      | TBA :TEVS <sup>a</sup><br>(x:y) | Mn(kDa) <sup>b</sup> |
|--------------|---------------------------------|----------------------|
| TBA-TEVS-9   | 91: 9                           | 33                   |
| TBA-TEVS-21  | 79 : 21                         | 15                   |
| TBA-TEVS-26  | 74 : 26                         | 15                   |
| TBA-TEVS-34  | 66:34                           | 13                   |
| TBA-TEVS-50  | 50 : 50                         | 10                   |
| TBA-TEVS-100 | 0 : 100                         | 6                    |

<sup>a</sup> The molar ratio were determined by comparing peak integrals of hydrogen attached to the tertiary carbons of tertiary butyl acrylate and triethoxyvinylsilanes. <sup>b</sup> Data based on GPC (THF, PMMA standard).

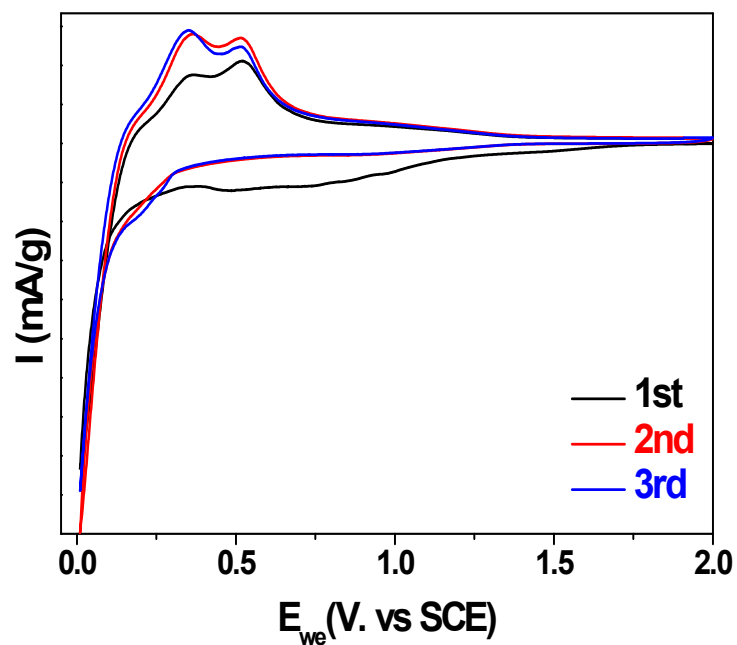

**Fig. S1** The first three cycle of cyclic voltammetry using a Si half-cell with TBA-TEVS-21 binder at a potential scan rate of 0.2mV/s

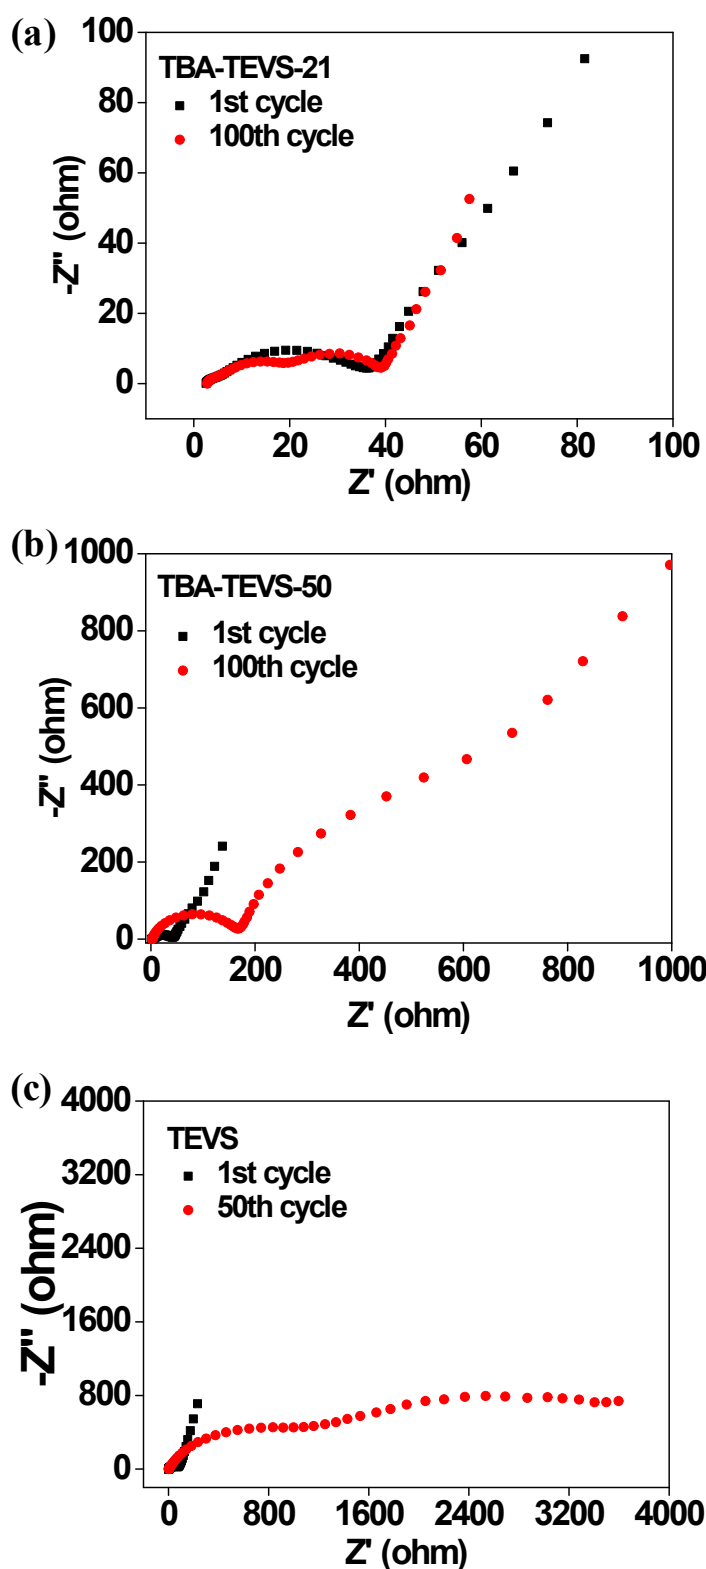

**Fig. S2** Nyquist plots of Si anode prepared with polymeric binders with various TEVS contents. (a) TBA-TEVS-21, (b) TBA-TEVS-50, and (c) TEVS. TBA-TEVS-21 sample showed the lowest SEI resistance and charge transfer resistance values, and also maintained initial resistance after 100 cycles.

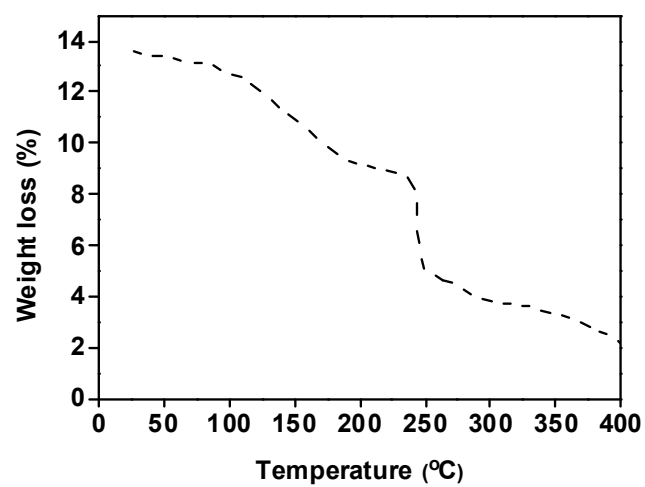

**Fig. S3** TGA analysis of poly (tert-butyl acrylate) showing decomposition of TBA group at 220 °C.

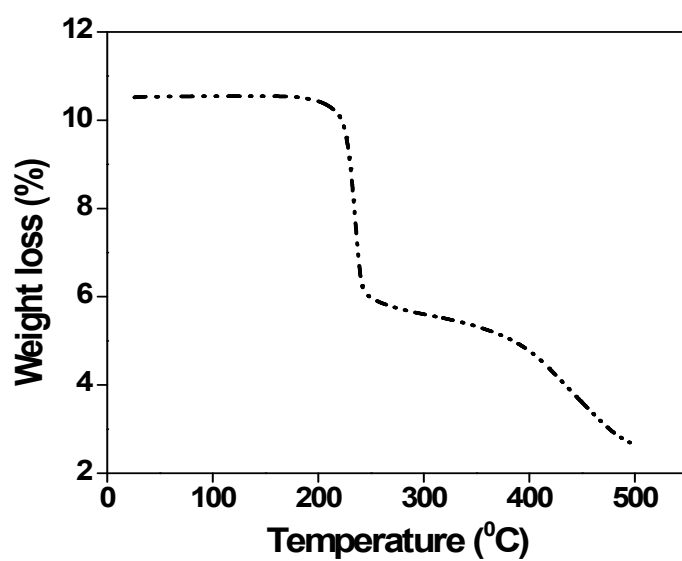

**Fig. S4** TGA analysis of TBA-TEVS-21 showing decomposition of TBA group at 215 °C.

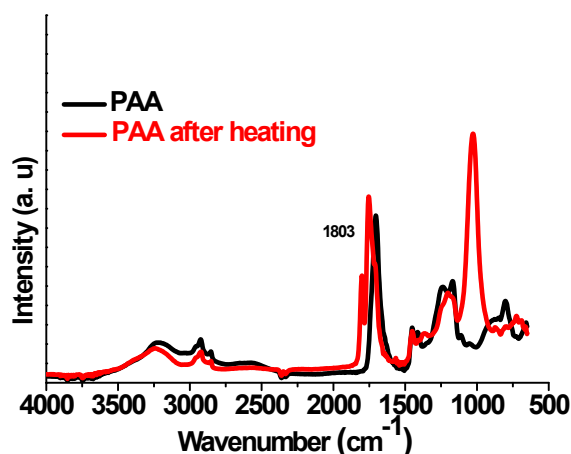

**Fig. S5** The FT-IR showing the formation of anhydride via crosslinking of adjacent carboxylic acid functional group as a result of condensation reaction after heating at 150°C.

The strong and solid evidence for the formation of anhydride via the condensation of carboxylic acid could be provided by FT-IR spectroscopy which has reported in the literatures<sup>1, 2</sup>. The peak appears around  $\sim 1800\text{ cm}^{-1}$  in the IR spectroscopy is attributed specifically for the carbonyl stretching frequency of anhydride. For example, the poly(acrylic acid)(PAA) after heat treatment at 150 °C forms anhydride and shows a distinct peak appear around  $1808\text{ cm}^{-1}$ . This peak is different from the carbonyl group of ester, acid, or carboxylate which usually appear less than  $1750\text{ cm}^{-1}$ .

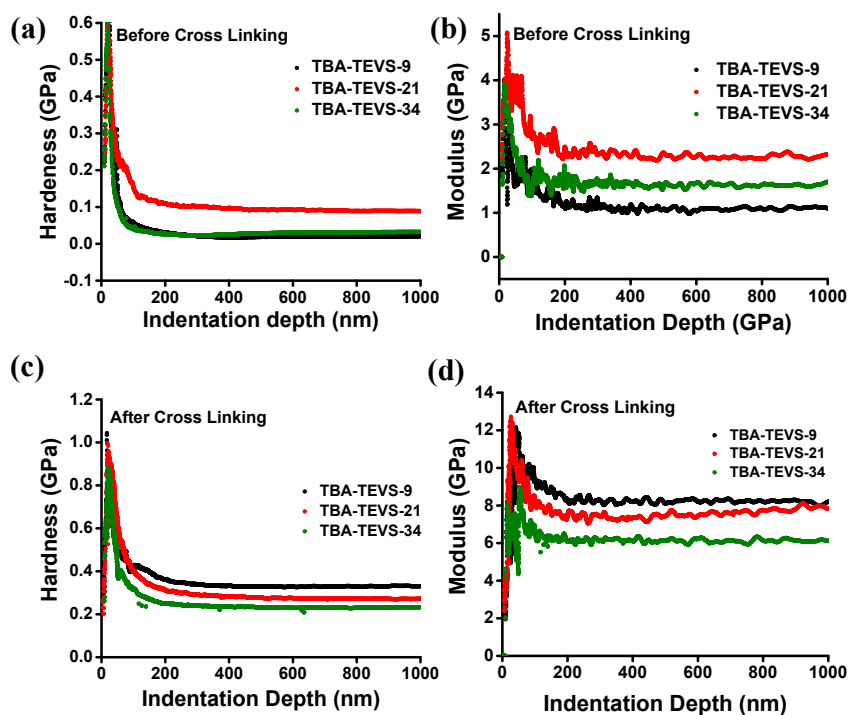

**Fig. S6** Hardness and Modulus measure for TBA-TEVS polymer series before (a), (b) and after (c), (d) cross linking.

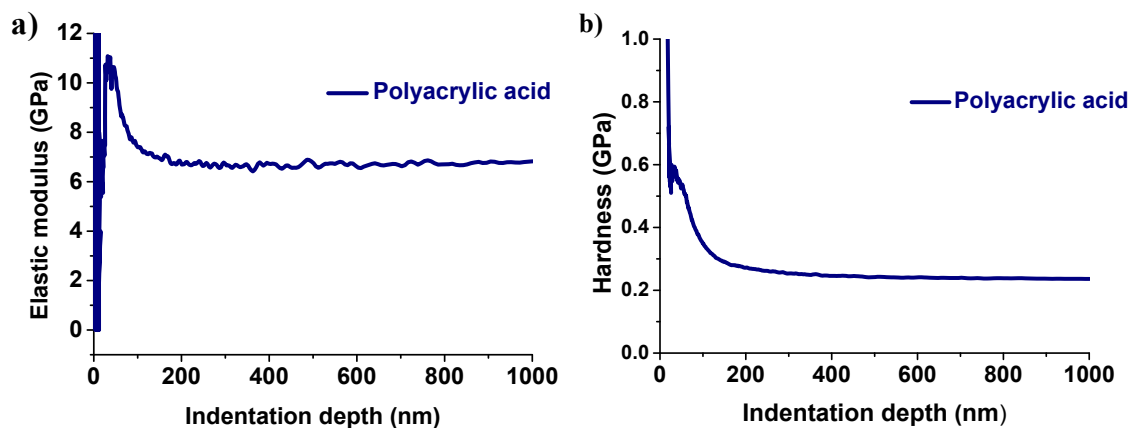

**Fig. S7** (a) Elastic modulus and (b) hardness of PAA measured by nanoindentation.

## Reference

1. B. I. Koo, H Kim, Y. Cho, K. T. Lee, N. S. Choi, J. Cho, *Angew. Chem. Int. Ed.* 2012, **51**, 8762–8767.
2. M. T. Jeena, J. I. Lee, S. H. Kim, C. Kim, J. Y. Kim, S. Park, J. H. Ryu, *ACS Appl. Mater. Interfaces*, 2014, **6**, 18001–18007.
